# Supplementary material for: Pyramidal neurons proportionately alter the identity and survival of specific cortical interneuron subtypes
Source: Research Square preprint supplement (doi:10.21203/rs.3.rs-4774421/v1), 2024-08-02
Supplement: Supplementary file 3 [file 718801cdab197ee16f90da6d.docx]

Supplementary Methods: Additional methodology description for FACS procedure, immunostaining, stereotaxic AAV injection, and Tamoxifen administration.

Supplementary Table 1: List of MERFISH probe set

Supplementary Table 2: Statistical test and P values
